# Supplementary material
Source: MDPI journal article supplement (https://www.mdpi.com/2073-4433/14/7/1126)
Supplement: s1 [file s1]

# The Future Impact of Shipping Emissions on Air Quality in Europe under Climate Change

Michael Russo <sup>1,\*</sup>, David Carvalho <sup>2</sup>, Jukka-Pekka Jalkanen <sup>3</sup> and Alexandra Monteiro <sup>1</sup>

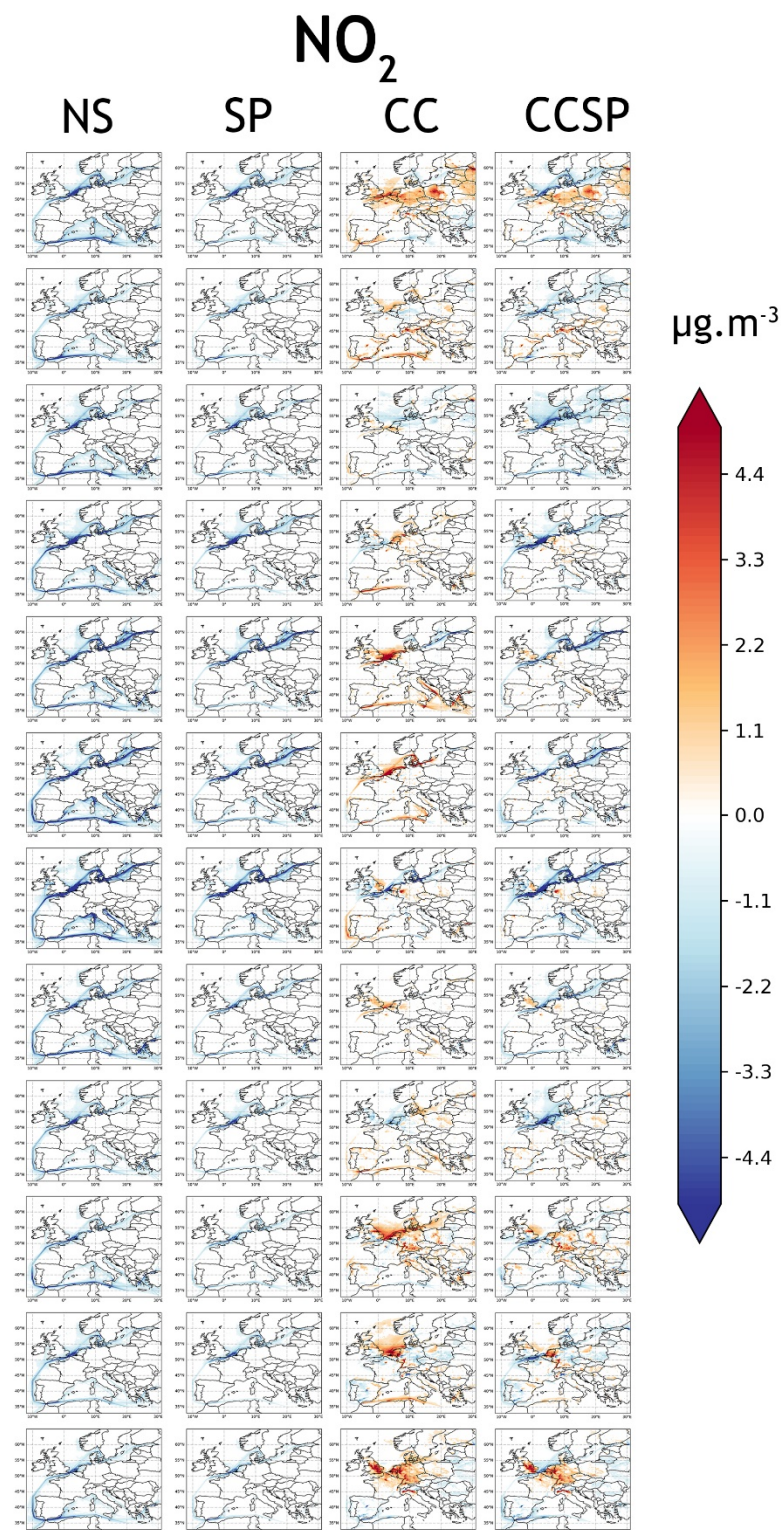

**Figure S1.** Median hourly difference for NO<sub>2</sub>, for each month of the year (top – Jan, bottom – Dec) for the four studied scenarios (NS - No Shipping; SP - Shipping projection; CCO - Only climate change; CCSP - Climate change and shipping projection).

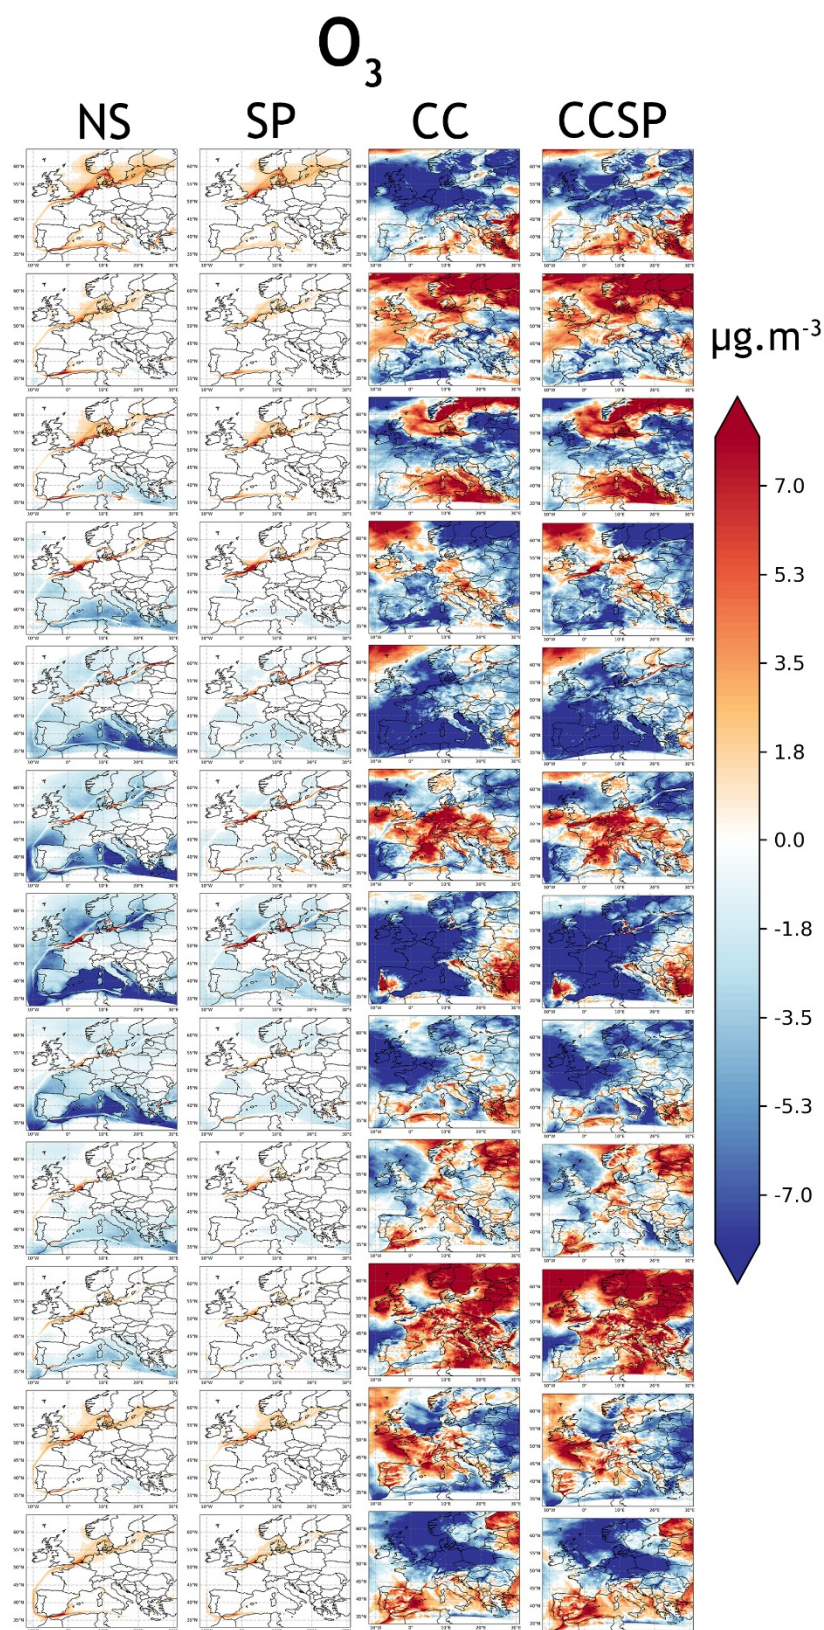



**Figure S2.** Median hourly difference for O<sub>3</sub>, for each month of the year (top – Jan, bottom – Dec) for the four studied scenarios (NS - No Shipping; SP - Shipping projection; CCO - Only climate change; CCSP - Climate change and shipping projection).

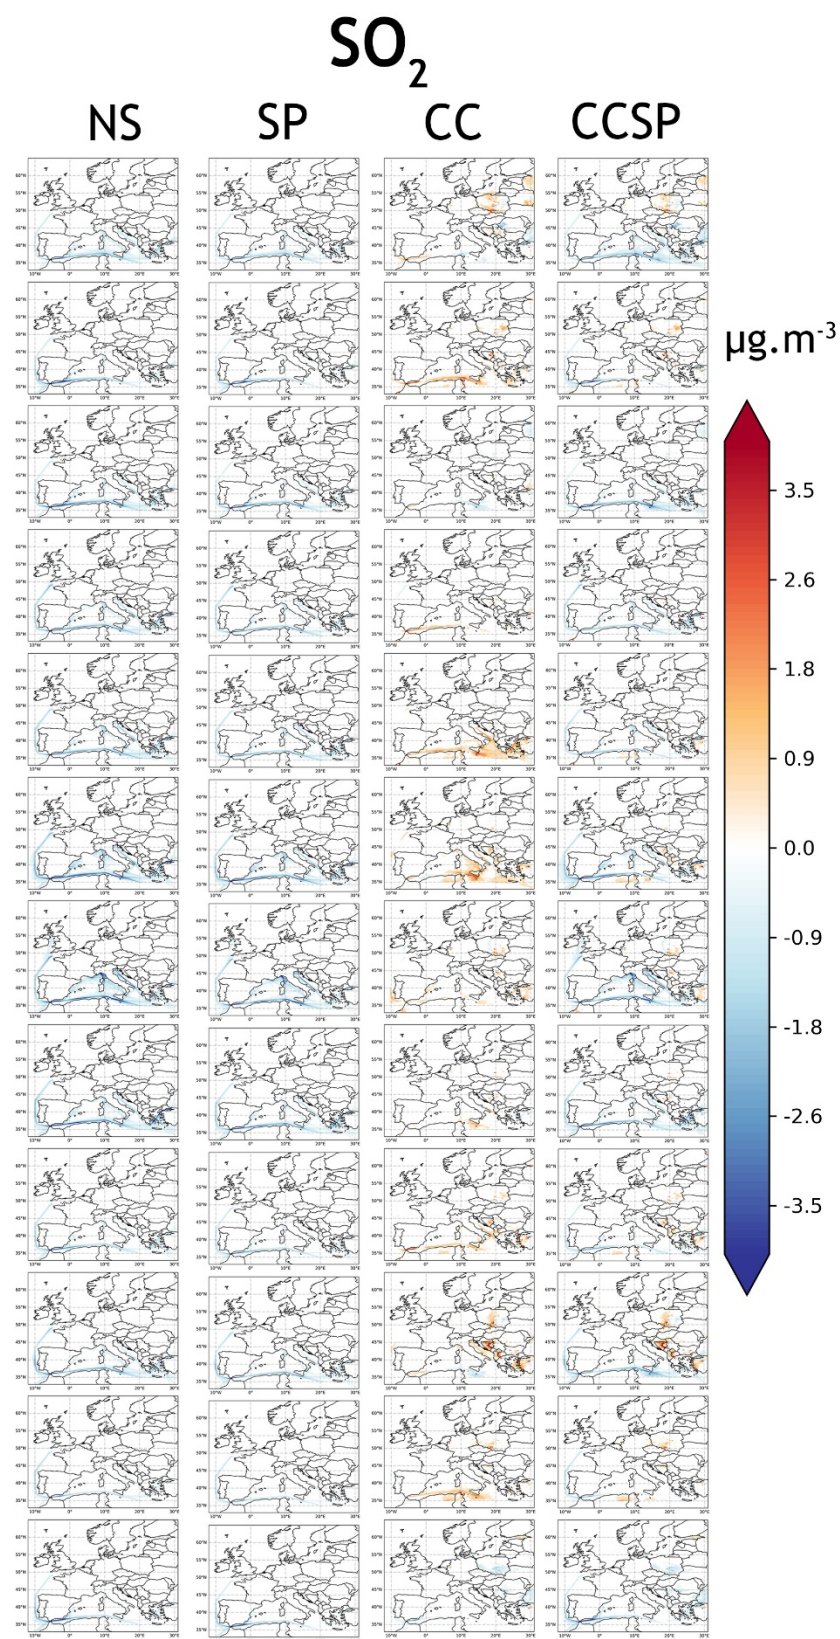

**Figure S3.** Median hourly difference for SO<sub>2</sub>, for each month of the year (top – Jan, bottom – Dec) for the four studied scenarios (NS - No Shipping; SP - Shipping projection; CCO - Only climate change; CCSP - Climate change and shipping projection).

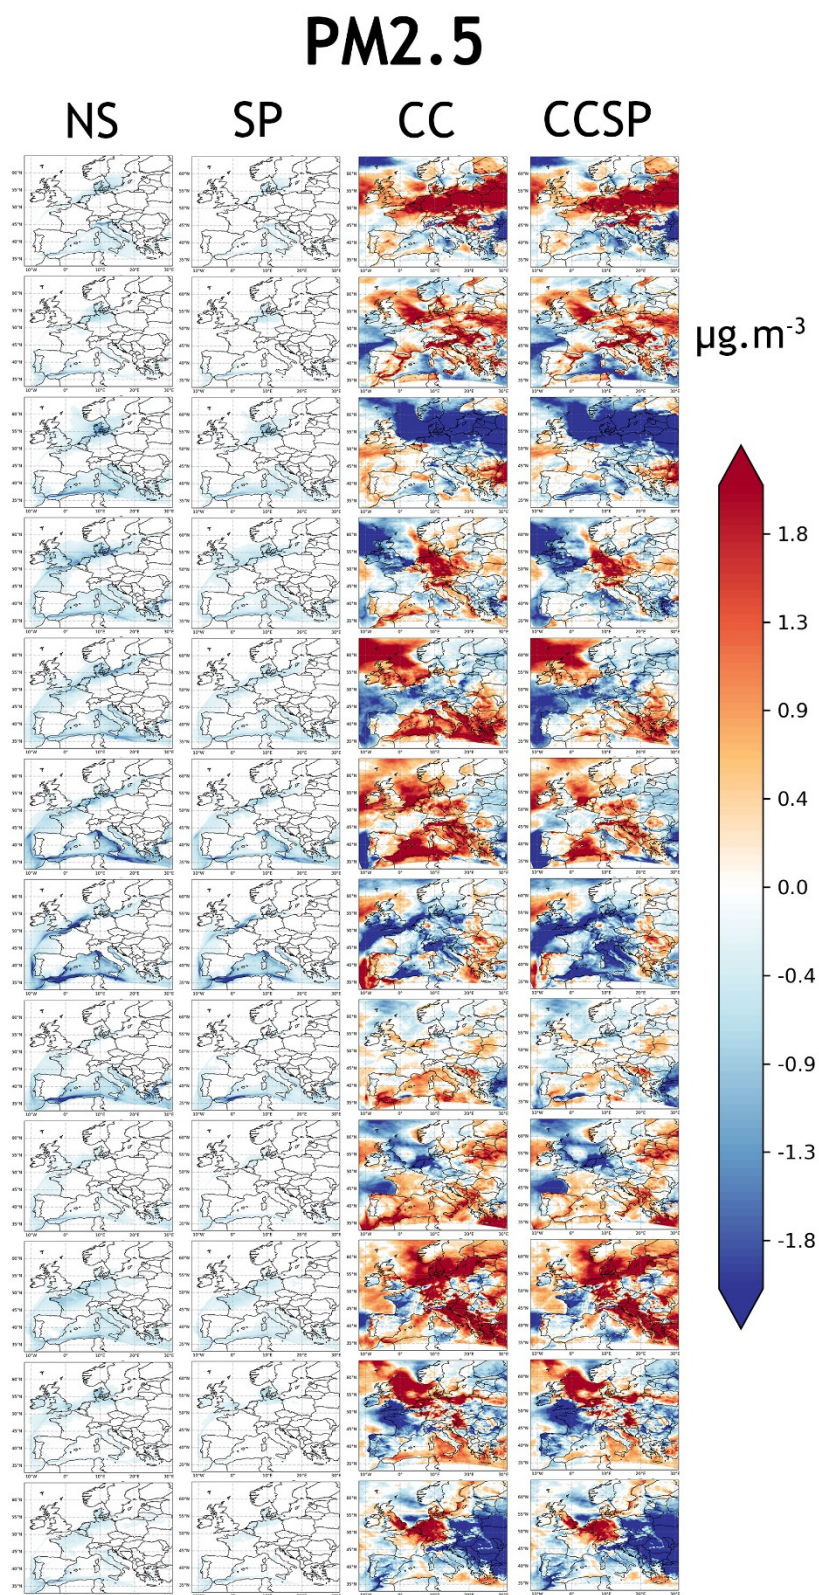

**Figure S4.** Median hourly difference for PM<sub>2.5</sub>, for each month of the year (top – Jan, bottom – Dec) for the four studied scenarios (NS - No Shipping; SP - Shipping projection; CCO - Only climate change; CCSP - Climate change and shipping projection).
